# Supplementary material for: Fabrication and catalytic application of a tandem reactor module using Au nanoparticle-coated glass beads as packing materials
Source: Royal Society of Chemistry journal article supplement (doi:10.1039/d1re00489a), 2022-01-01
Supplement: d1re00489a1.pdf [file d1re00489a1.pdf]

## Supplementary Information

### **Fabrication and catalytic application of tandem reactor module using Au nanoparticles-coated glass beads as packing materials**

Li Sun<sup>1\*</sup>, Feiyang Ma<sup>1</sup>, Yuejin Shan<sup>2</sup>, Yuan Zhi<sup>3</sup>, Mengying Sun<sup>1</sup> and Binlin Dou<sup>1</sup>,

<sup>1</sup> Shanghai Key Laboratory of Multiphase Flow and Heat Transfer in Power Engineering, School of Energy and Power Engineering, University of Shanghai for Science and Technology, Jun Gong Road 516, Shanghai 200093, China

<sup>2</sup> Department of Material and Environmental Chemistry, Research Division of Functional Materials Design, Utsunomiya University, Yoto 7-1-2, Utsunomiya 321-8585, Japan

<sup>3</sup> R&D Department, Shanghai Minrula Biotechnology Co.,Ltd, Building 15, Haji Sixth Road 218, Shanghai 201306, China

\* Corresponding author: E-mail: marybrother@yeah.net; Tel: +86 21 55272740; Fax: +86 21 55272376

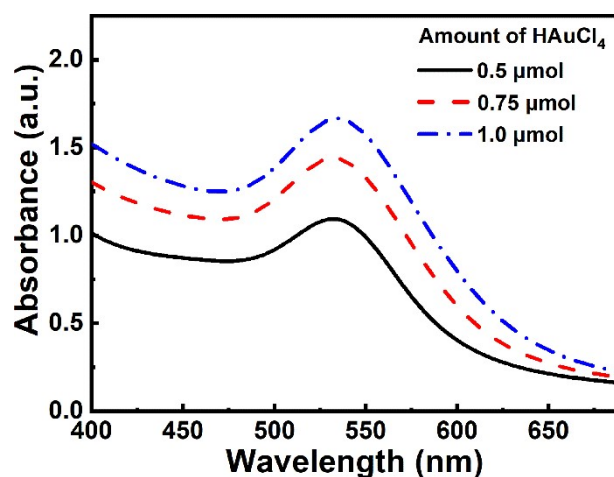

**Fig. S1.** UV-Vis absorbance spectra of Au NPs synthesized in 3.0 mL of AYR extract with different amount of HAuCl<sub>4</sub>.

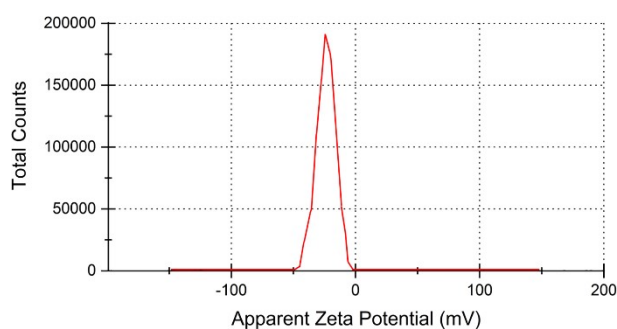

**Fig. S2.** Zeta potential distribution of Au NPs.

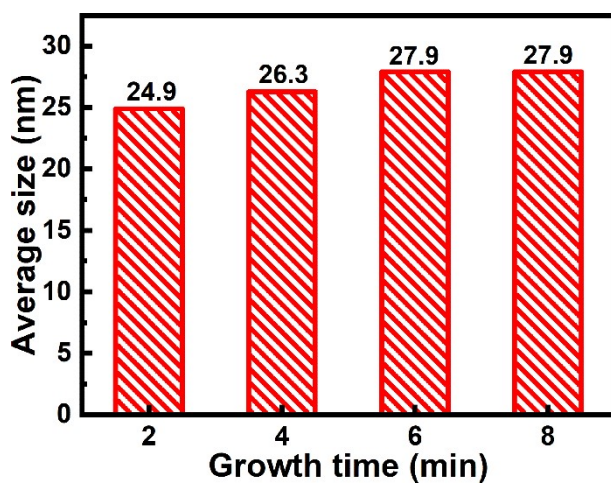

**Fig. S3.** Average sizes of Au NPs-coated glass beads prepared at different growth time (2~8 min).

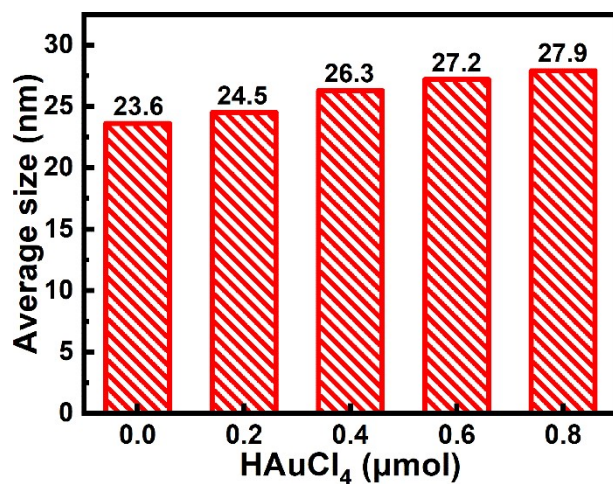

**Fig. S4.** Average sizes of Au NPs-coated glass beads prepared in the growth solution with different amount of HAuCl<sub>4</sub> (0~0.8 μmol).

**Table S1** Concentration and loss of Au element in the growth solution.

| Growth conditions         |                   | $C_{Au1}$ <sup>a</sup> (ppm) | $C_{Au2}$ <sup>b</sup> (ppm) | <i>Loss</i> <sup>c</sup> (%) |
|---------------------------|-------------------|------------------------------|------------------------------|------------------------------|
| HAuCl <sub>4</sub> (μmol) | Growth time (min) |                              |                              |                              |
| 0.8                       | 6                 | 52.41                        | 10.36                        | 19.8                         |
| 0.8                       | 8                 | 52.41                        | 10.34                        | 19.7                         |
| 0.6                       | 8                 | 39.39                        | 1.94                         | 4.9                          |

<sup>a</sup> Concentration of Au element before the seeds growth.

<sup>b</sup> Concentration of Au element after the seeds growth.

$$^c \text{Loss} = \frac{C_{Au2}}{C_{Au1}}$$
